# Supplementary material for: Acute toxic leukoencephalopathy in migrant workers exposed to organic solvents in construction materials
Source: PubMed Central journal article supplement — Occup Environ Med. 2013 Feb 6;70(6):435–6. doi: 10.1136/oemed-2012-101302 (PMC3664387; doi:10.1136/oemed-2012-101302), 2013-02-06

Supplemental Figure. T-2 weighted MRI images showing diffuse symmetric white matter lesions in subcortical and periventricular areas, internal capsules were also involved bilaterally.

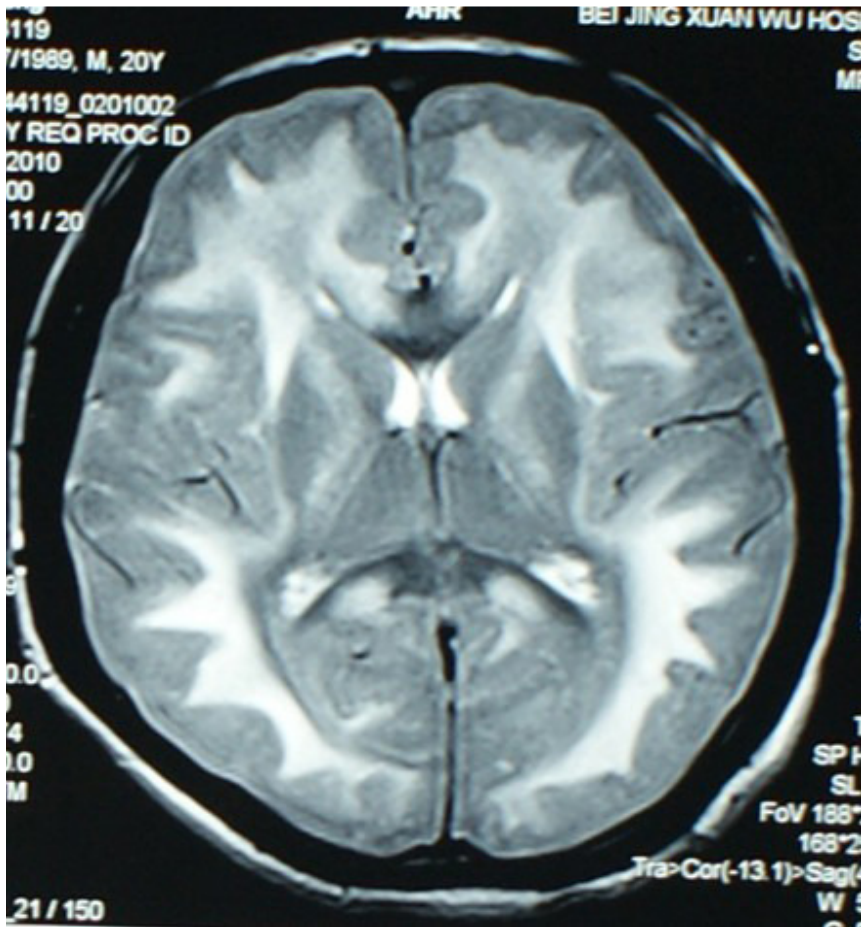

Supplement: oemed-2012-101302-s1.pdf [file oemed-2012-101302-s1.pdf]
